# Supplementary material
Source: PubMed Central journal article supplement (PMC2862803)
Supplement: NIHMS190826-supplement-03.pdf [file NIHMS190826-supplement-03.pdf]

Supplemental Table 3: 11 $\beta$ HSD mRNA levels for each tissue between midshipman reproductive morphs

| <b>Morph</b>                                                                                              | <b>Tissue</b>               | <b>Normalized Mean</b>                                | <b>Standard Error</b>      | <b>ANOVA Values</b>                     |
|-----------------------------------------------------------------------------------------------------------|-----------------------------|-------------------------------------------------------|----------------------------|-----------------------------------------|
| Male Type I<br>Male Type II<br>Female                                                                     | <b>OB/Tel/POA</b>           | 0.009* <sup>1</sup><br>0.0017<br>0.0019               | 0.0036<br>0.0007<br>0.0002 | p=0.0079<br>dF=2, 11<br>F-ratio=7.77    |
| Male Type I<br>Male Type II<br>Female                                                                     | <b>Mid/ Di/ Cbl</b>         | 0.0093<br>0.0302* <sup>2</sup><br>0.0028              | 0.0033<br>0.008<br>0.0006  | p=0.0011<br>dF=2, 11<br>F-ratio=13.63   |
| Male Type I<br>Male Type II<br>Female                                                                     | <b>Vocal Hindbrain - SC</b> | 0.0095<br>0.05* <sup>3</sup><br>0.0016                | 0.0061<br>0.0112<br>0.0003 | p=0.0002<br>dF=2, 11<br>F-ratio=20.29   |
| Male Type I<br>Male Type II<br>Female                                                                     | <b>Vocal Muscle</b>         | 0.0774* <sup>4</sup><br>0.0026<br>0.033* <sup>5</sup> | 0.018<br>0.0007<br>0.01    | p<0.0001<br>dF=2, 12<br>F-ratio=33.48   |
| Male Type I<br>Male Type II                                                                               | <b>Testis</b>               | 0.06* <sup>4</sup><br>0.0045                          | 0.0125<br>0.002            | p p<0.0001<br>dF=1, 8<br>F-ratio=147.70 |
| <sup>1</sup> I>II and F, <sup>2</sup> II>F, <sup>3</sup> II>I and F, <sup>4</sup> I>II, <sup>5</sup> F>II |                             |                                                       |                            |                                         |

Supplemental Table 3: Normalized values and standard errors for 11 $\beta$ HSD values are listed according to midshipman morph. ANOVA values (p value, degrees of freedom-dF, and Fratio) are also listed for each analysis performed within each tissue. Footnotes at bottom of the table indicate the direction of significant differences between the morphs.

Arterbery et al., Supplemental Table 3
